# Supplementary material for: Co-crystallization experiments of thiocarbamides with bipyridine-type molecules
Source: Royal Society of Chemistry journal article supplement (doi:10.1039/b822555a), 2009-01-01

Electronic Supplementary Material for CrystEngComm  
This journal is (c) The Royal Society of Chemistry 2009

**Co-crystallization experiments of thiocarbamides with bipyridine-type  
molecules†**

**Carol A. Ellis, Michael A. Miller, James Spencer, Julio Zukerman-Schpector and  
Edward R. T. Tiekink**

*Department of Chemistry, The University of Texas at San Antonio, One UTSA Circle, San  
Antonio, Texas 78249-0698, USA. Fax 1 210 458 7428; Tel: 1 210 458 5774; E-mail:  
Edward.Tiekink@utsa.edu*

*Southwest Research Institute, P.O. Drawer 28510, San Antonio, Texas, 78228-0510*

*Universidade Federal de São Carlos, Laboratório de Cristalografia, Estereodinâmica e  
Modelagem Molecular, Departamento de Química, C.P. 676, São Carlos, São Paulo,  
13565-905, Brazil*

**\*\*\* Electronic Supplementary Information \*\*\***

**Table S(1).** Selected bond distances (Å) for ROC(=S)N(H)R' in their pure crystalline form and in co-crystals (1) – (5).

| Compound                                      | C1=S1      | C1–N1      | C1–O1      |
|-----------------------------------------------|------------|------------|------------|
| MeOC(=S)N(H)Ph <sup>1</sup>                   | 1.671(1)   | 1.329(2)   | 1.329(1)   |
| MeOC(=S)N(H)Ph in (1)                         | 1.6747(17) | 1.336(2)   | 1.3345(19) |
| MeOC(=S)N(H)PhNO <sub>2</sub> -4 <sup>2</sup> | 1.664(2)   | 1.345(2)   | 1.322(2)   |
| MeOC(=S)N(H)PhNO <sub>2</sub> -4 in (2)       | 1.661(4)   | 1.363(5)   | 1.329(4)   |
| EtOC(=S)N(H)Ph <sup>3,a</sup>                 | 1.636(5)   | 1.327(7)   | 1.301(7)   |
|                                               | 1.651(5)   | 1.324(7)   | 1.296(6)   |
|                                               | 1.650(5)   | 1.319(7)   | 1.311(7)   |
| EtOC(=S)N(H)Ph in (3)                         | 1.6672(16) | 1.3309(18) | 1.343(2)   |
| EtOC(=S)N(H)PhNO <sub>2</sub> -4 <sup>4</sup> | 1.672(2)   | 1.354(3)   | 1.321(3)   |
| EtOC(=S)N(H)PhNO <sub>2</sub> -4 in (4)       | 1.659(5)   | 1.369(6)   | 1.328(5)   |
| iPrOC(=S)N(H)Ph <sup>5</sup>                  | 1.6748(16) | 1.334(2)   | 1.3216(19) |
| iPrOC(=S)N(H)Ph in (5)                        | 1.671(3)   | 1.339(4)   | 1.330(3)   |

*a* Three independent molecules in the crystallographic asymmetric unit

References: 1. S. Y. Ho, C. S. Lai and E. R. T. Tiekink, *Acta Crystallogr. Sect. E: Struct. Reports Online*, 2003, **59**, o1155; 2. S. Y. Ho, R. P. A. Bettens, D. Dakternieks, A. Duthie and E. R.T. Tiekink, *CrystEngComm*, 2005, **7**, 682; 3. R. L. Taylor and E. R. T. Tiekink, *Z. Kristallogr.*, 1994, **209**, 64; 4. R. E. Benson, G. A. Broker, L. M. Daniels, E. R. T. Tiekink, J. L. Wardell and D. J. Young, *Acta Crystallogr. Sect. E: Struct. Reports Online*, 2006, **62**, o4106; and 5. F. S. Kuan, F. Mohr, P. P. Tadbuppa and E. R.T. Tiekink, *CrystEngComm*, 2007, **9**, 574.

**Table S(2).** Selected bond and torsion angles (°) for ROC(=S)N(H)R' in their pure crystalline form and in co-crystals (**1**) – (**5**).

| Compound                                         | S1–C1–O1   | S1–C1–N1   | O1–C1–N1   | S1/C1/N1/C2 | C1/N1/C2/C3 |
|--------------------------------------------------|------------|------------|------------|-------------|-------------|
| MeOC(=S)N(H)Ph <sup>1</sup>                      | 124.5(1)   | 123.0(1)   | 112.5(1)   | 178.2(1)    | -60.1(2)    |
| MeOC(=S)N(H)Ph in ( <b>1</b> )                   | 124.85(12) | 121.96(12) | 113.15(14) | -178.62(13) | 31.3(3)     |
| MeOC(=S)N(H)PhNO <sub>2</sub> -4 <sup>2</sup>    | 124.5(1)   | 121.9(1)   | 113.6(2)   | -175.9(1)   | -176.0(2)   |
| MeOC(=S)N(H)PhNO <sub>2</sub> -4 in ( <b>2</b> ) | 125.6(3)   | 121.5(3)   | 112.9(3)   | 173.9(3)    | -21.0(6)    |
| EtOC(=S)N(H)Ph <sup>3,a</sup>                    | 125.0(4)   | 122.2(4)   | 112.8(5)   | 174.0(5)    | 37.1(9)     |
|                                                  | 124.9(4)   | 121.8(4)   | 113.3(4)   | 173.5(5)    | 158.3(6)    |
|                                                  | 124.3(4)   | 122.2(4)   | 113.6(4)   | -177.0(5)   | -17(1)      |
| EtOC(=S)N(H)Ph in ( <b>3</b> )                   | 124.54(11) | 122.88(11) | 112.58(13) | 173.39(12)  | 23.2(3)     |
| EtOC(=S)N(H)PhNO <sub>2</sub> -4 <sup>4</sup>    | 125.0(2)   | 121.6(2)   | 113.5(2)   | 178.9(2)    | -3.8(4)     |
| EtOC(=S)N(H)PhNO <sub>2</sub> -4 in ( <b>4</b> ) | 125.3(3)   | 122.1(3)   | 112.5(4)   | -178.0(4)   | 4.0(8)      |
| iPrOC(=S)N(H)Ph <sup>5</sup>                     | 125.4(1)   | 121.59(1)  | 113.1(1)   | 178.2(1)    | 141.7(2)    |
| iPrOC(=S)N(H)Ph in ( <b>5</b> )                  | 125.7(2)   | 122.0(2)   | 112.2(2)   | -179.7(2)   | -48.3(4)    |

*a* Three independent molecules in the crystallographic asymmetric unit

References: 1. S. Y. Ho, C. S. Lai and E. R. T. Tiekink, *Acta Crystallogr. Sect. E: Struct. Reports Online*, 2003, **59**, o1155; 2. S. Y. Ho, R. P. A. Bettens, D. Dakternieks, A. Duthie and E. R. T. Tiekink, *CrystEngComm*, 2005, **7**, 682; 3. R. L. Taylor and E. R. T. Tiekink, *Z. Kristallogr.*, 1994, **209**, 64; 4. R. E. Benson, G. A. Broker, L. M. Daniels, E. R. T. Tiekink, J. L. Wardell and D. J. Young, *Acta Crystallogr. Sect. E: Struct. Reports Online*, 2006, **62**, o4106; and 5. F. S. Kuan, F. Mohr, P. P. Tadbuppa and E. R. T. Tiekink, *CrystEngComm*, 2007, **9**, 574.

**Figure S(1).** Unit cell contents highlighting the stacking of layers in co-crystal **(1)**. The crystal structure of co-crystal **(3)** is isomorphous with co-crystal **(1)**. Colour code in this and remaining diagrams: sulphur, yellow; oxygen, red; nitrogen, blue; carbon, grey; and hydrogen, green.

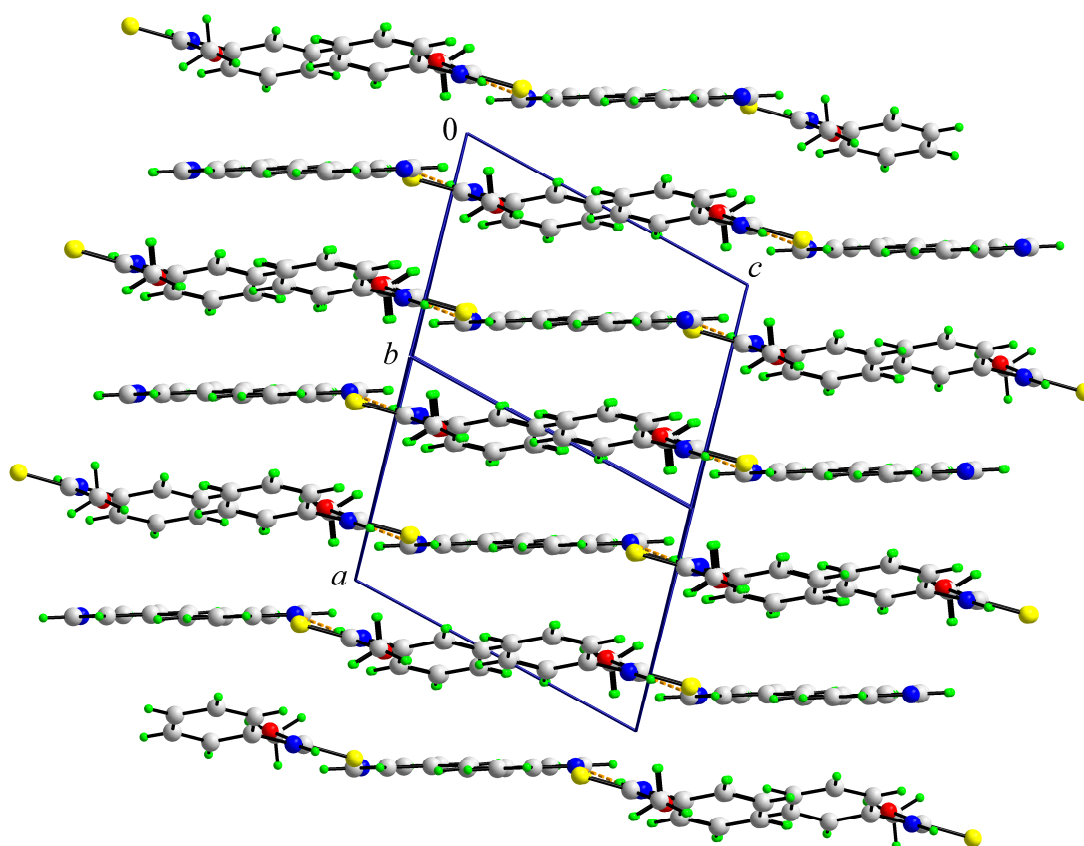

**Figure S(2).** Layers in the structure of co-crystal (**2**). Supramolecular chains mediated by N–H...N hydrogen bonds (orange dashed lines) and C–H...O contacts (blue dashed lines) run along the *c*-axis and are connected into layers in the *a*-direction via C–H... $\pi$  and  $\pi$ ... $\pi$  interactions (not shown).

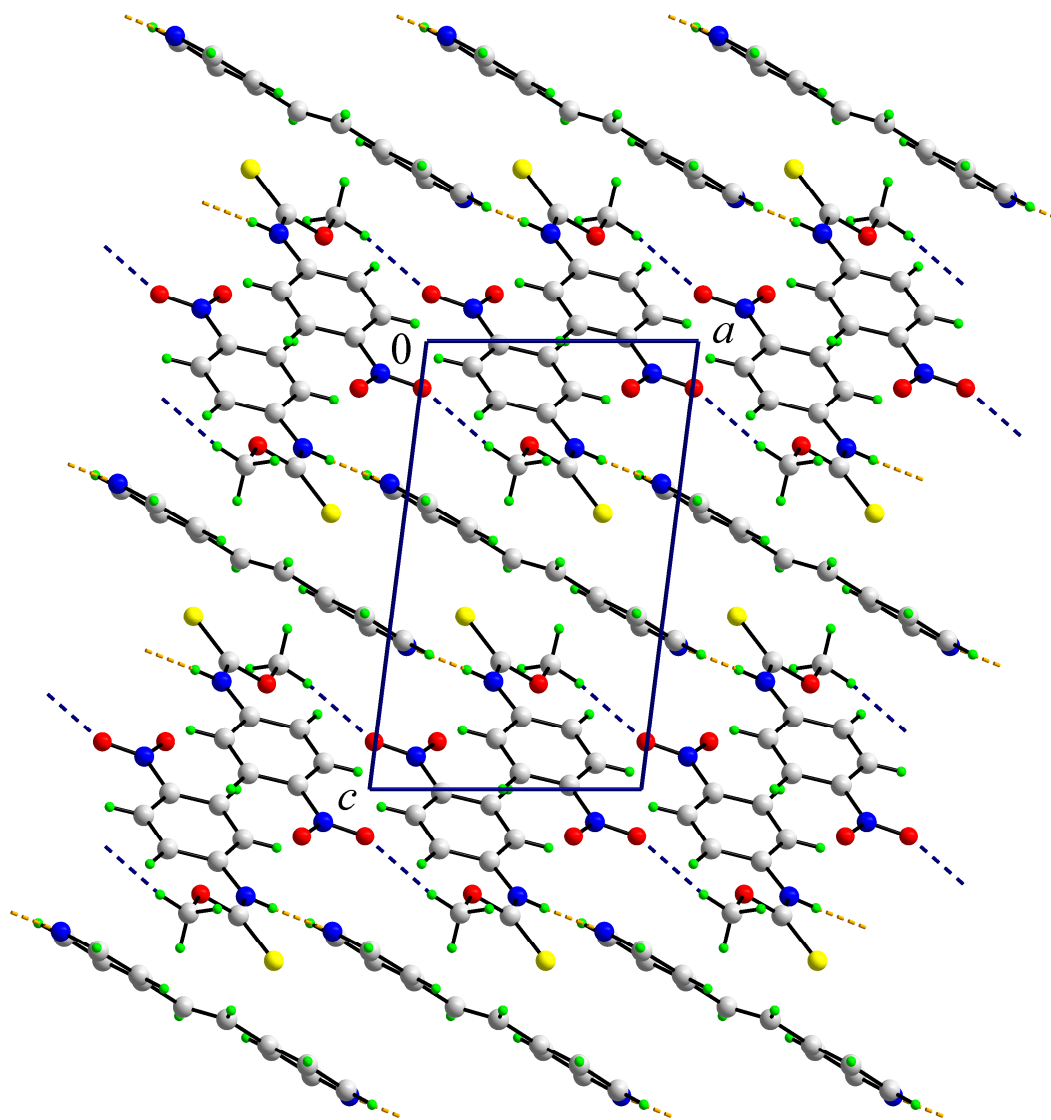

**Figure S(3).** Unit cell contents for co-crystal (4) viewed down the *b*-axis highlighting the stacking of layers along the *c*-direction.

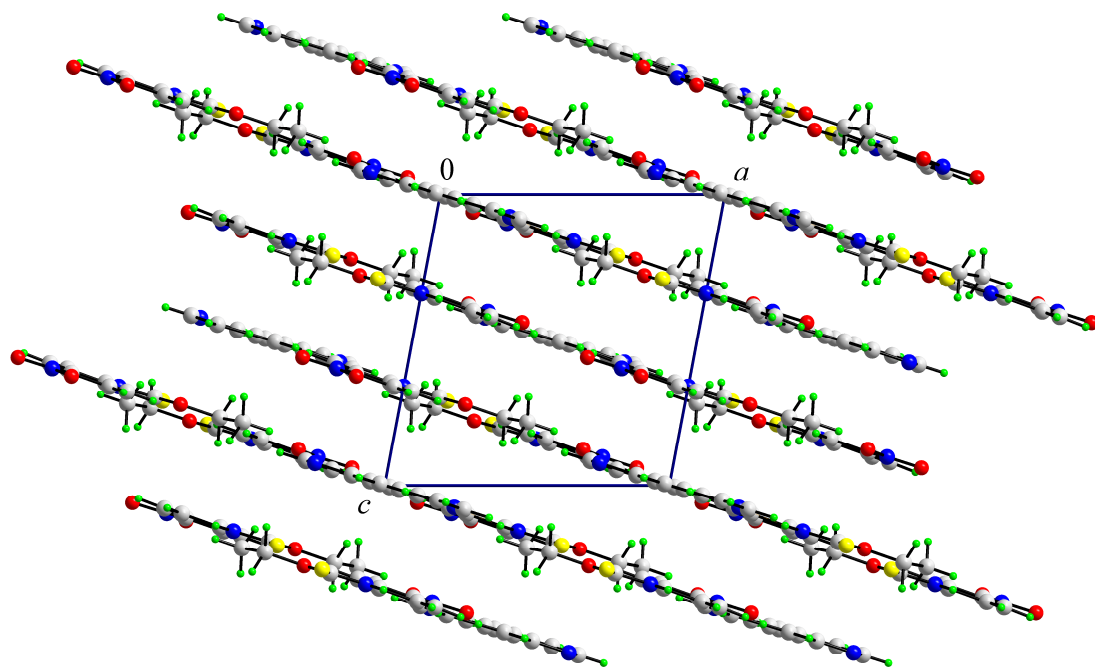

**Figure S(4).** PXRD patterns for co-crystal (**1**): MeOC(=S)N(H)Ph (black trace); *trans*-1,2-bis(4-pyridyl)ethene (red trace); 2:1 mixture (grinding) of MeOC(=S)N(H)Ph and *trans*-1,2-bis(4-pyridyl)ethene (green trace); and 2:1 mixture (solvent drop grinding) of MeOC(=S)N(H)Ph and *trans*-1,2-bis(4-pyridyl)ethene (blue trace).

Summary: Evidence for co-crystal formation.

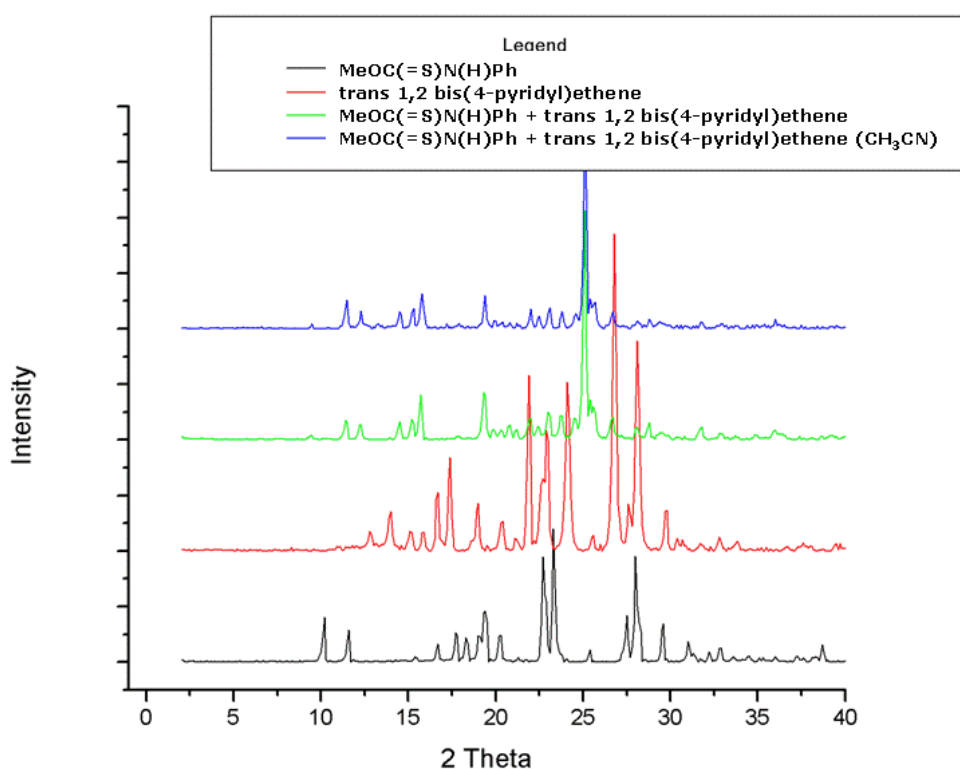

**Figure S(5).** PXRD patterns for co-crystal (**1**): 2:1 mixture (grinding) MeOC(=S)N(H)Ph and *trans*-1,2-bis(4-pyridyl)ethene (black trace); 2:1 mixture (solvent drop grinding) MeOC(=S)N(H)Ph and *trans*-1,2-bis(4-pyridyl)ethene (red trace) isolated single crystals of 2:1 MeOC(=S)N(H)Ph and *trans*-1,2-bis(4-pyridyl)ethene co-crystal (green trace); and calculated pattern from single crystal data for 2:1 MeOC(=S)N(H)Ph and *trans*-1,2-bis(4-pyridyl)ethene co-crystal (blue trace).

Summary: Bulk material corresponds to structure determined by single crystal X-ray crystallography.

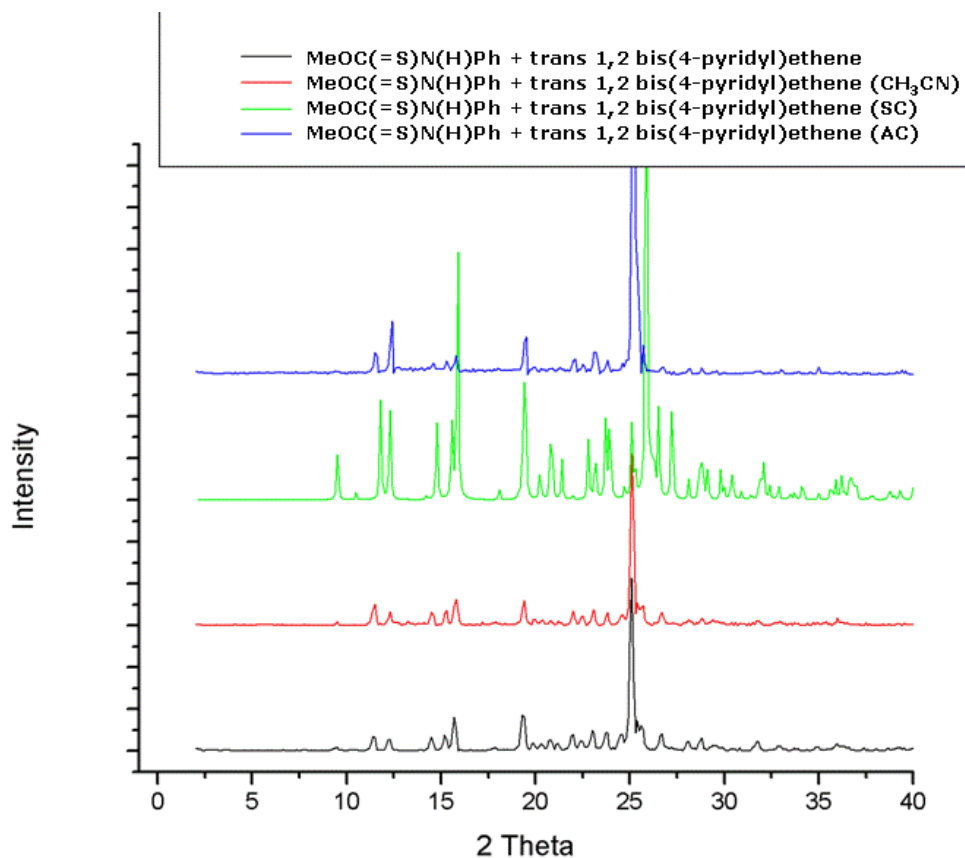



**Figure S(6).** PXRD patterns for co-crystal (**2**): MeOC(=S)N(H)PhNO<sub>2</sub>-4 (black trace); *trans*-1,2-bis(4-pyridyl)ethene (red trace); 2:1 mixture (grinding) of MeOC(=S)N(H)PhNO<sub>2</sub>-4 and *trans*-1,2-bis(4-pyridyl)ethene (green trace); and 2:1 mixture (solvent drop grinding) of MeOC(=S)N(H)PhNO<sub>2</sub>-4 and *trans*-1,2-bis(4-pyridyl)ethene (blue trace).

Summary: Evidence for co-crystal formation by solvent drop grinding.

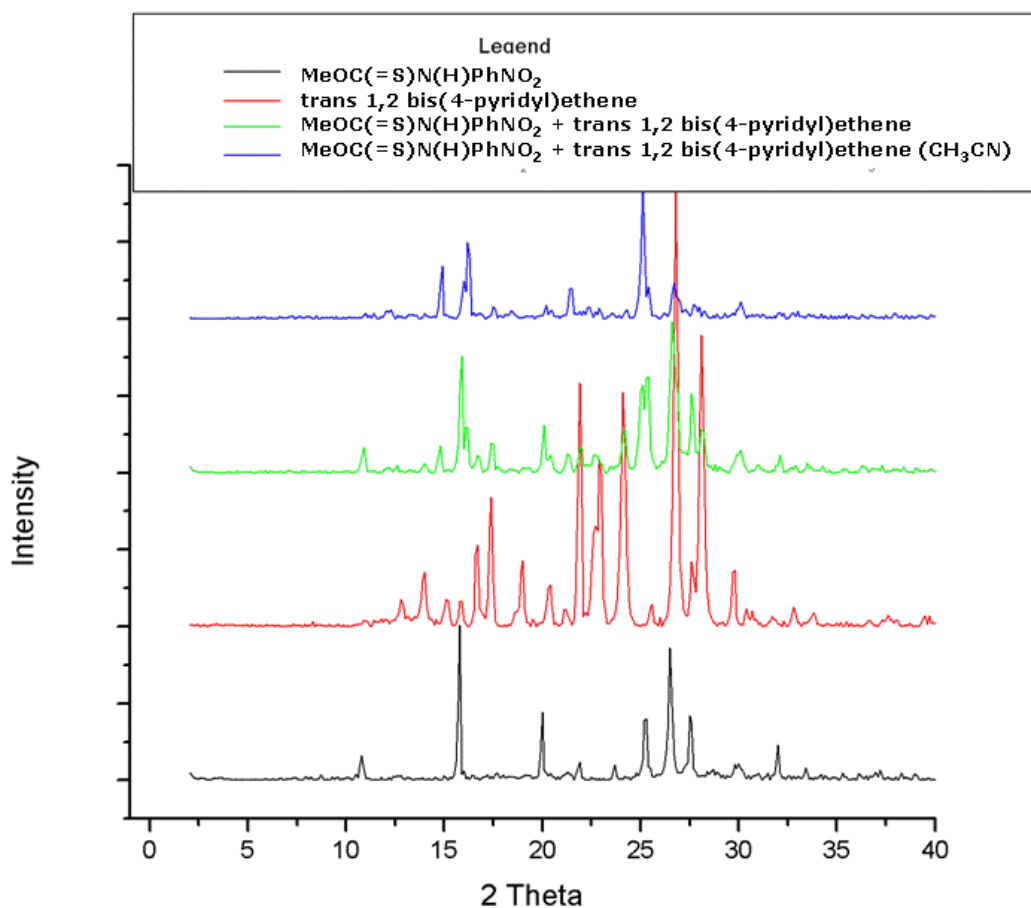

**Figure S(7).** PXRD patterns for co-crystal (**2**): 2:1 mixture (grinding) MeOC(=S)N(H)PhNO<sub>2</sub>-4 and *trans*-1,2-bis(4-pyridyl)ethene (black trace); 2:1 mixture (solvent drop grinding) MeOC(=S)N(H)PhNO<sub>2</sub>-4 and *trans*-1,2-bis(4-pyridyl)ethene (red trace); isolated single crystals of 2:1 MeOC(=S)N(H)PhNO<sub>2</sub>-4 and *trans*-1,2-bis(4-pyridyl)ethene co-crystal (green trace); and calculated pattern from single crystal data for 2:1 MeOC(=S)N(H)PhNO<sub>2</sub>-4 and *trans*-1,2-bis(4-pyridyl)ethene co-crystal (blue trace).  
Summary: The solvent drop grinded bulk material corresponds to structure determined by single crystal X-ray crystallography.

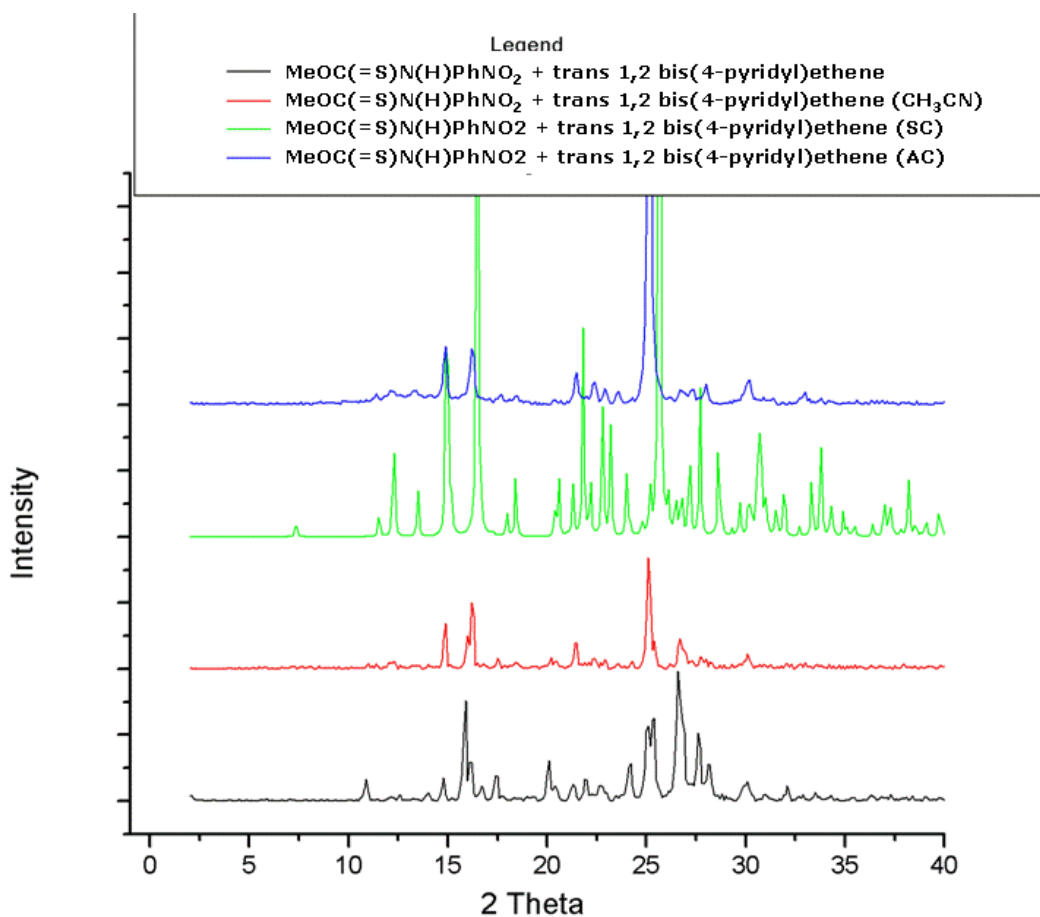

**Figure S(8).** PXRD patterns for co-crystal (**3**): isolated single crystals of 2:1 EtOC(=S)N(H)Ph and *trans*-1,2-bis(4-pyridyl)ethene co-crystal (black trace); and 2:1 mixture (grinding) of EtOC(=S)N(H)Ph and *trans*-1,2-bis(4-pyridyl)ethene (red trace).

Summary: Evidence for co-crystal formation with solvent drop grinding.

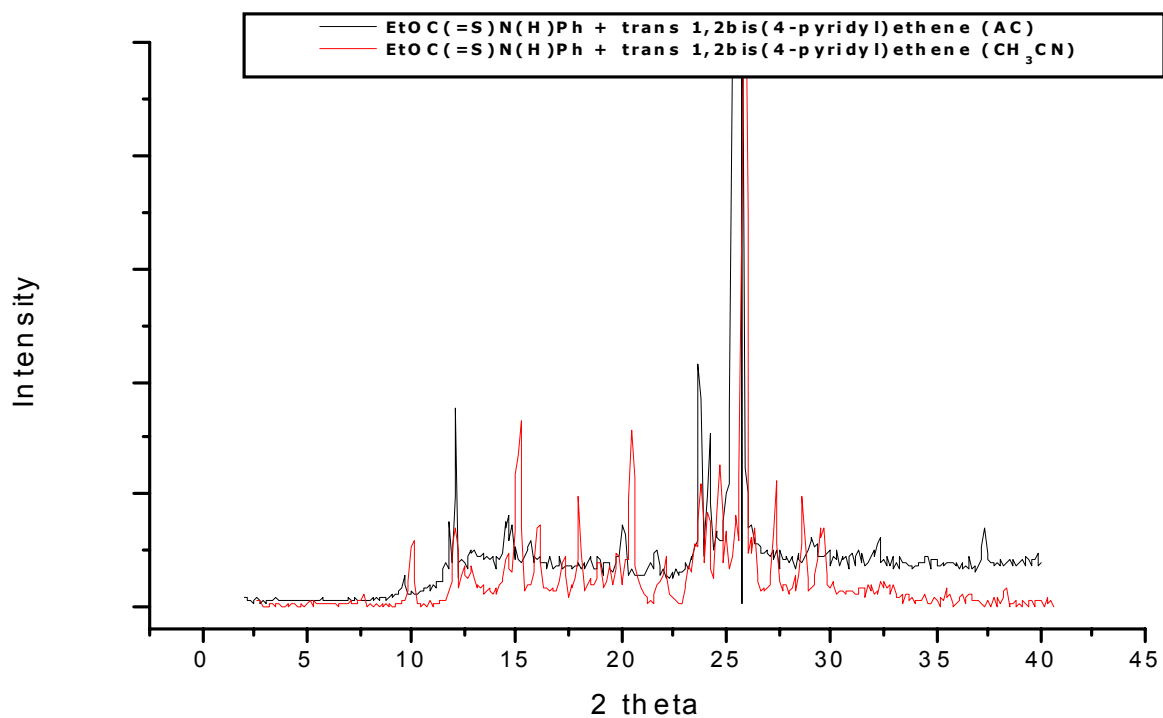

**Figure S(9).** PXRD patterns for co-crystal (**3**): isolated single crystals of 2:1 EtOC(=S)N(H)Ph and *trans*-1,2-bis(4-pyridyl)ethene co-crystal (black trace); and calculated pattern from single crystal data for 2:1 EtOC(=S)N(H)Ph and *trans*-1,2-bis(4-pyridyl)ethene co-crystal (red).

Summary: Bulk material corresponds to structure determined by single crystal X-ray crystallography.

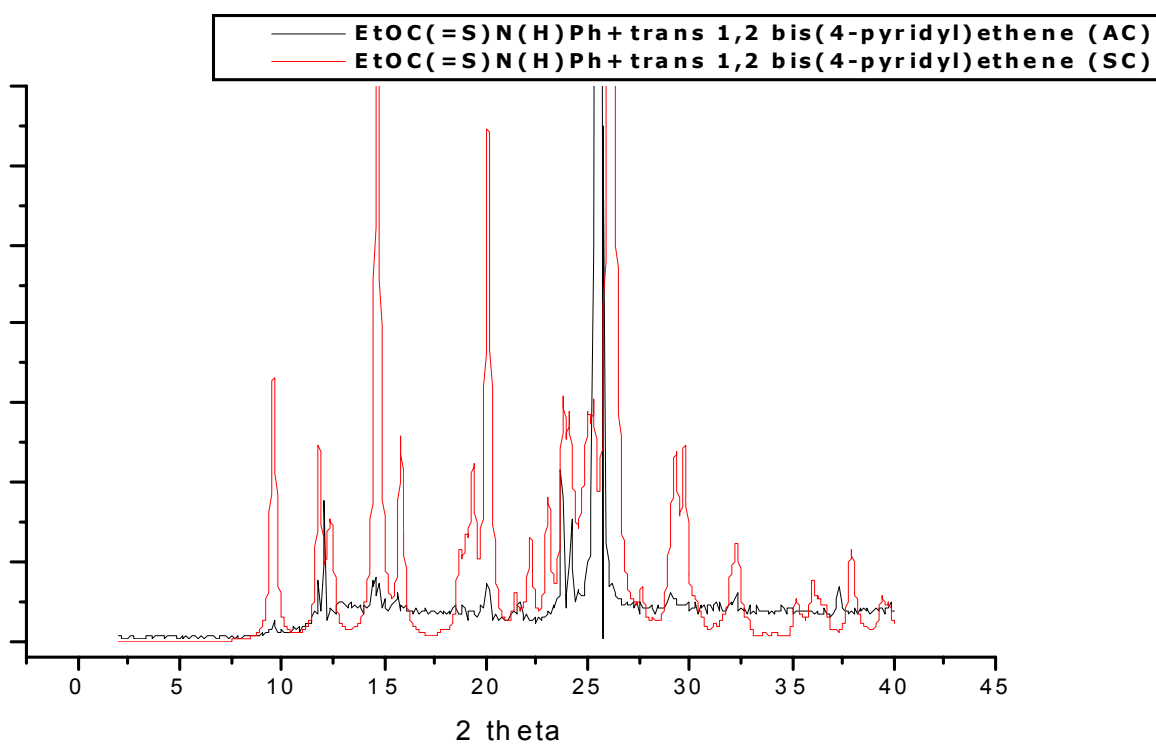

**Figure S(10).** PXRD patterns for co-crystal (**4**): EtOC(=S)N(H)PhNO<sub>2</sub>-4 (black trace); 4,4'-bipyridine (red trace); 2:1 mixture (grinding) of EtOC(=S)N(H)PhNO<sub>2</sub>-4 and 4,4'-bipyridine (green trace); and 2:1 mixture (solvent drop grinding) of EtOC(=S)N(H)PhNO<sub>2</sub>-4 and 4,4'-bipyridine (blue trace).

Summary: Evidence for co-crystal formation with solvent drop grinding.

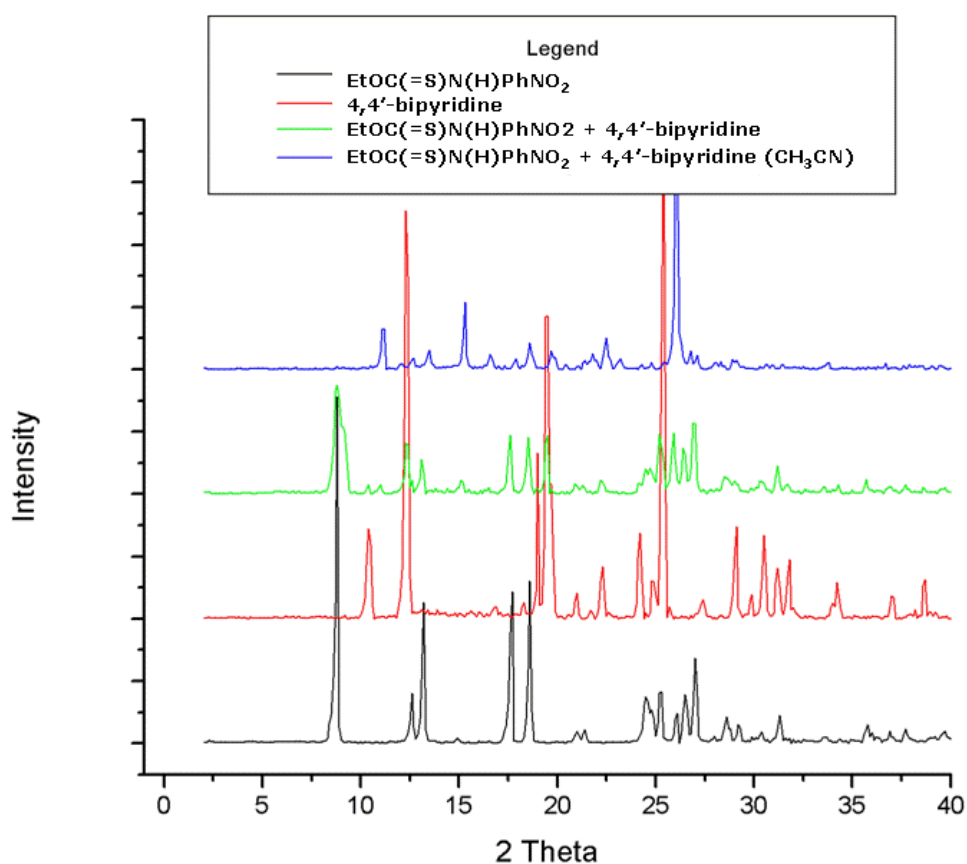

**Figure S(11).** PXRD patterns for co-crystal (**4**): 2:1 mixture (grinding) of EtOC(=S)N(H)PhNO<sub>2</sub>-4 and 4,4'-bipyridine EtOC(=S)N(H)PhNO<sub>2</sub>-4 (black trace); 2:1 mixture (solvent drop grinding) of EtOC(=S)N(H)PhNO<sub>2</sub> and 4,4'-bipyridine EtOC(=S)N(H)PhNO<sub>2</sub>-4 (red trace); isolated single crystals of 2:1 EtOC(=S)N(H)PhNO<sub>2</sub>-4 and 4,4'-bipyridine co-crystal (green trace); and calculated pattern from single crystal data for 2:1 EtOC(=S)N(H)PhNO<sub>2</sub>-4 and 4,4'-bipyridine co-crystal (blue trace).

Summary: The bulk material obtained by solvent drop grinding corresponds to structure determined by single crystal X-ray crystallography.

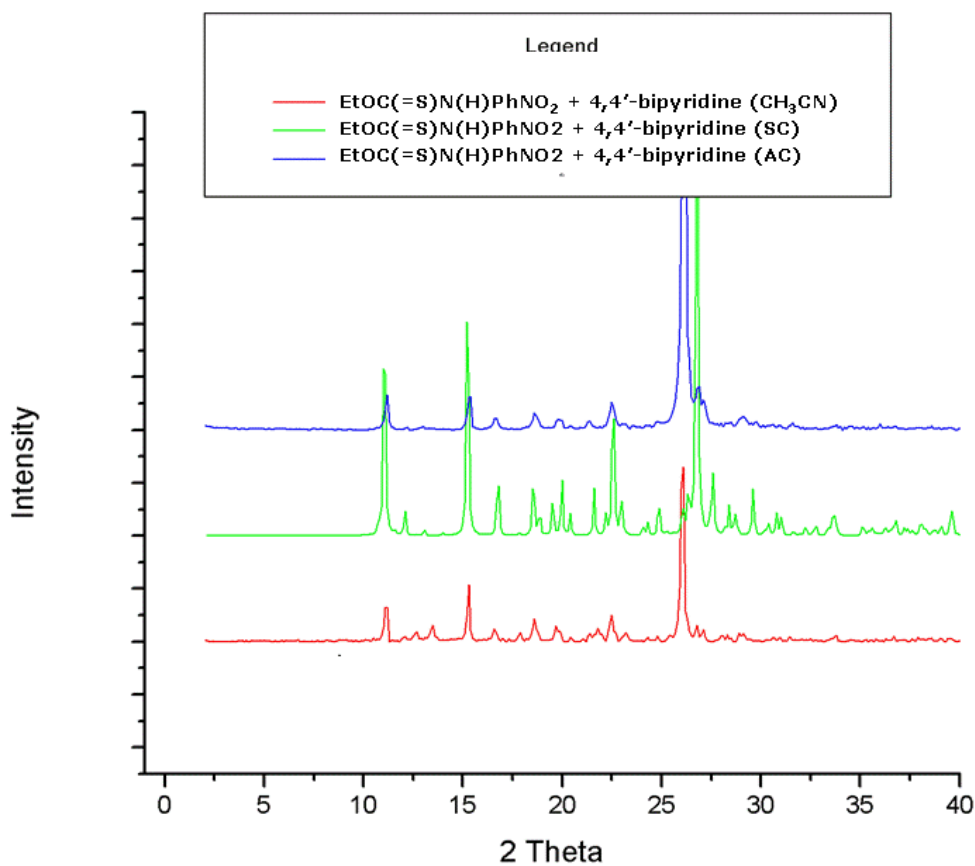

**Figure S(12).** PXRD patterns for co-crystal (**5**): isolated single crystals of 2:1 MeOC(=S)N(H)PhNO<sub>2</sub> and *trans*-1,2-bis(4-pyridyl)ethene co-crystal (black trace); and calculated pattern from single crystal data for 2:1 MeOC(=S)N(H)PhNO<sub>2</sub> and *trans*-1,2-bis(4-pyridyl)ethene co-crystal (red trace).

Summary: Bulk material corresponds to structure determined by single crystal X-ray crystallography.

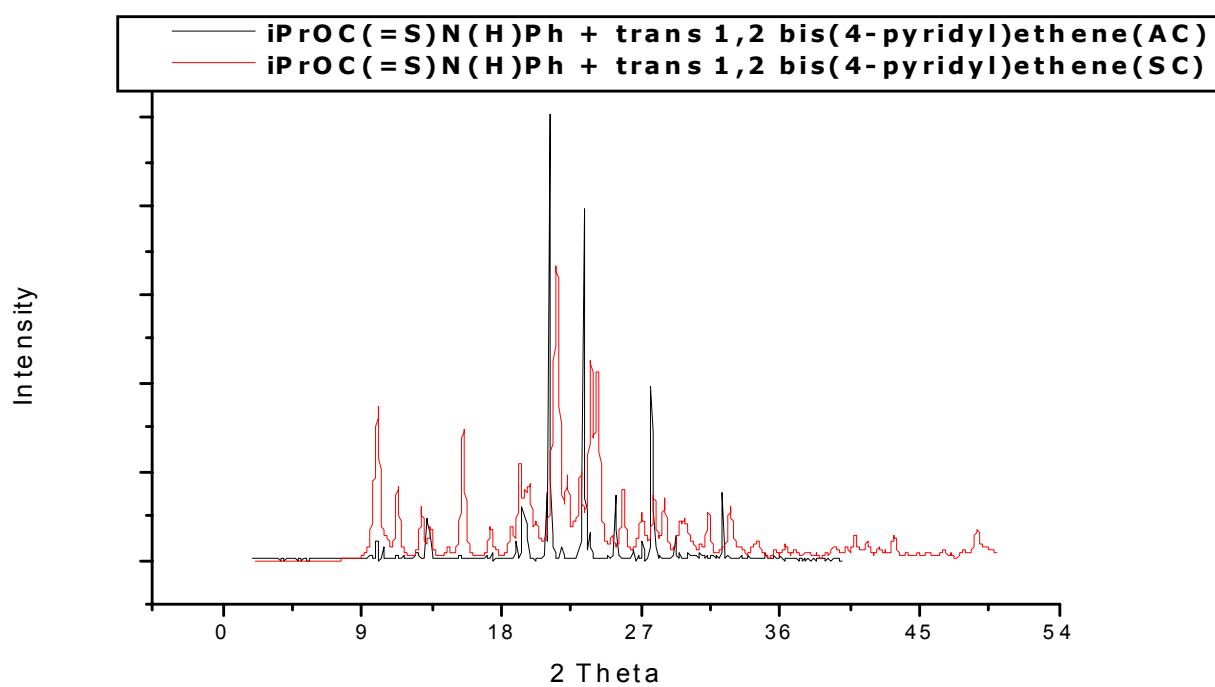

**Figure S(13).** PXRD patterns for co-crystal (5): isolated single crystals of 2:1 MeOC(=S)N(H)PhNO<sub>2</sub> and *trans*-1,2-bis(4-pyridyl)ethene co-crystal (black trace) and 2:1 mixture (grinding) of iPrOC(=S)N(H)Ph and *trans*-1,2-bis(4-pyridyl)ethene (red trace).

Summary: The phases are distinct indicating that the new phase formed by grinding is not the same as that deposited as crystals from solution.

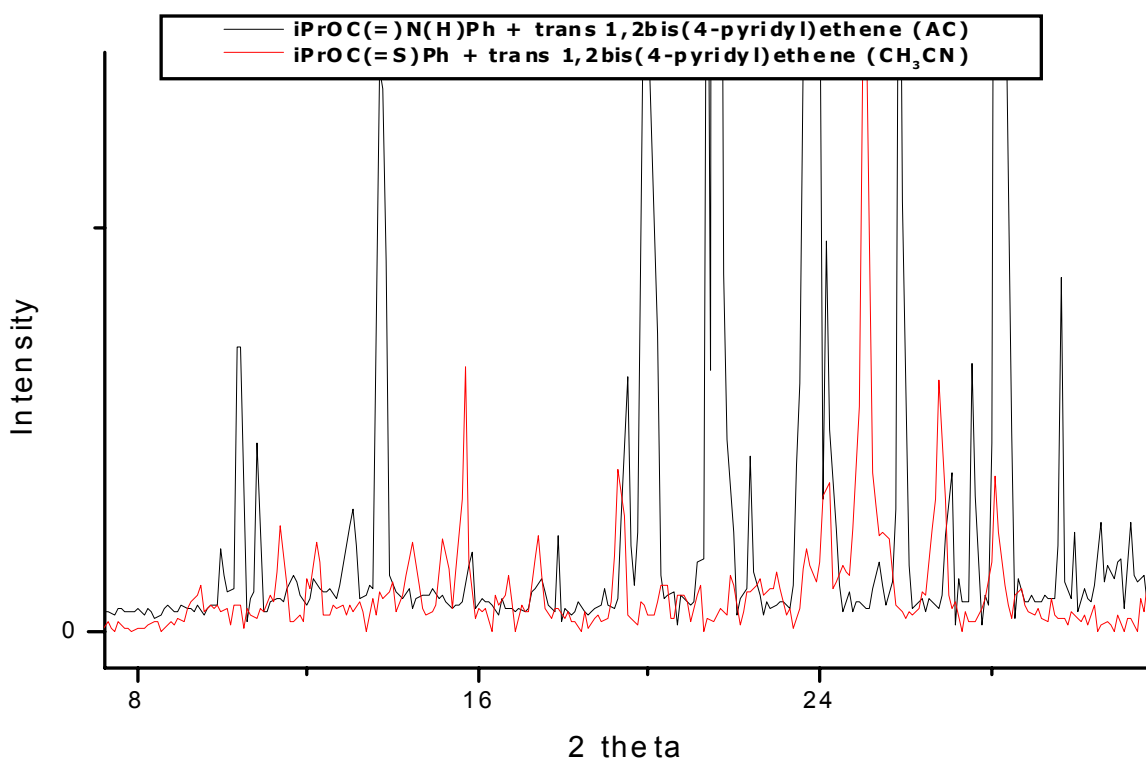

Supplement: b822555a.pdf [file b822555a.pdf]
